# Supplementary material
Source: publisher figshare collection journal article supplement (https://frontiersin.figshare.com/ndownloader/files/25874328)

# Morphological Traits

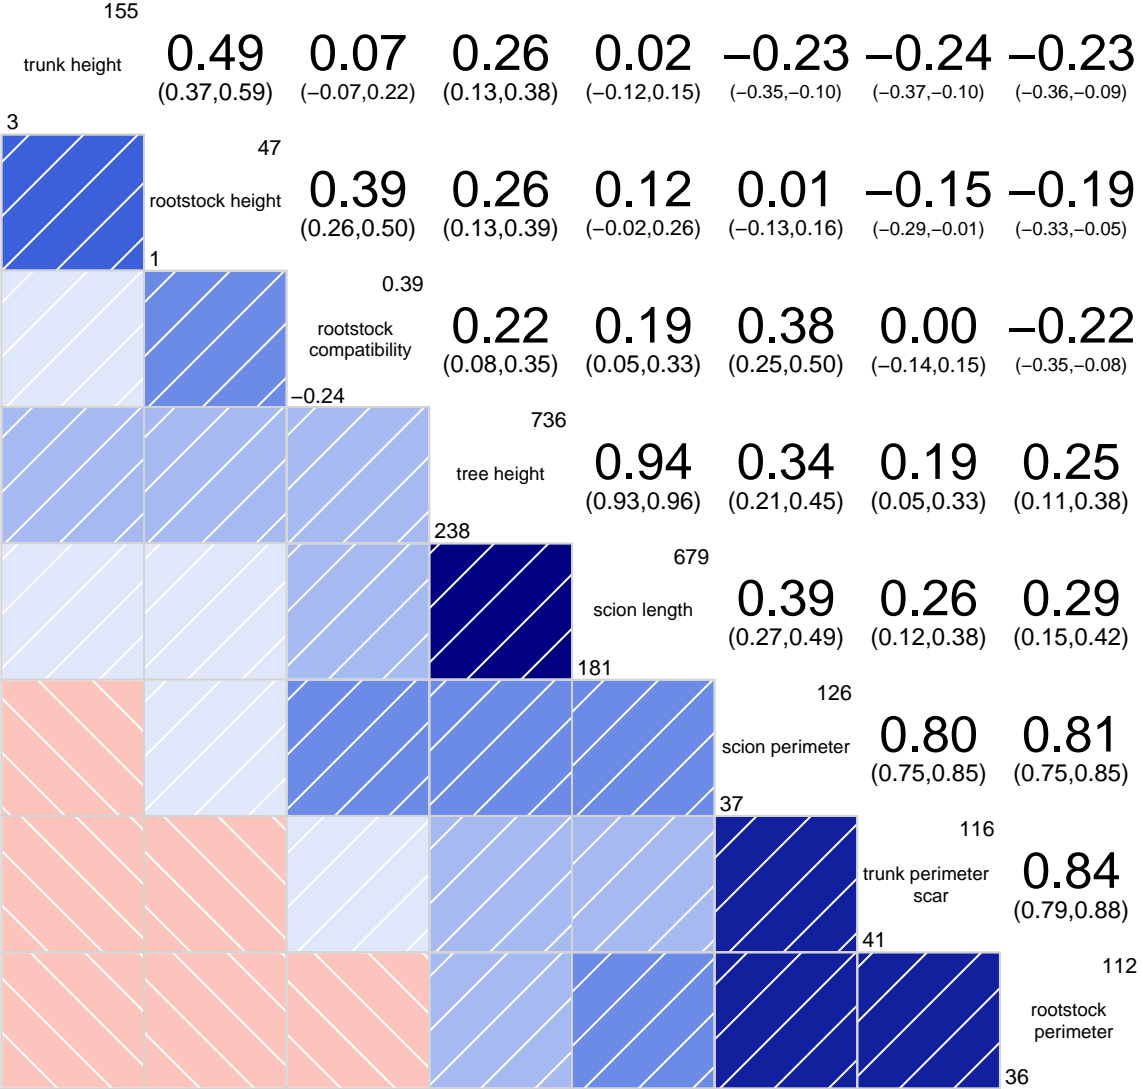

Supplement: Supplementary file [file 25874328]
